# Supplementary material for: Venetoclax Use in Paediatric Haemato-Oncology Centres in Poland: A 2022 Survey
Source: MDPI journal article supplement (doi:10.3390/children10040745), 2023-04-19
Supplement: s1 [file s1]

### Supplementary Table S1

A list of cancer cell lines most sensitive to *BCL2* loss in a genome-wide CRISPR loss-of-function screen. Public version of DepMap Cancer Dependency Map portal at <https://depmap.org/> accessed on March 5, 2023.

| No        | Gene Effect (Chronos) | Cel line      | Disease              | Age (years)   | Known driver genetics |
|-----------|-----------------------|---------------|----------------------|---------------|-----------------------|
| 1         | -1.79                 | SKMM2         | NHL                  | 54            | no data               |
| 2         | -1.29                 | OCILY19       | NHL                  | 27            | no data               |
| <b>3</b>  | <b>-1.24</b>          | <b>SEM</b>    | <b>BCP-ALL</b>       | <b>5</b>      | <b>KMT2A::AFF1</b>    |
| 4         | -1.13                 | KMS27         | NHL                  | 52            | no data               |
| 5         | -1.07                 | EOL1          | MPN                  | 33            | no data               |
| <b>6</b>  | <b>-1.02</b>          | <b>HB1119</b> | <b>BCP-ALL</b>       | <b>&lt;18</b> | <b>KMT2A::ENL</b>     |
| 7         | -1.01                 | KARPAS1718    | NHL                  | no data       | no data               |
| 8         | -0.99                 | KMS18         | NHL                  | 60            | no data               |
| 9         | -0.90                 | DB            | NHL                  | 45            | no data               |
| <b>10</b> | <b>-0.88</b>          | <b>697</b>    | <b>BCP-ALL</b>       | <b>12</b>     | <b>TCF3::PBX</b>      |
| <b>11</b> | <b>-0.85</b>          | <b>REH</b>    | <b>BCP-ALL</b>       | <b>15</b>     | <b>ETV6::RUNX1</b>    |
| 12        | -0.84                 | JJN3          | NHL                  | 57            | no data               |
| 13        | -0.81                 | OCIAML2       | AML                  | 65            | DNMT3A R635W          |
| 14        | -0.77                 | MOLM14        | AML                  | 20            | ITD-FLT3              |
| <b>15</b> | <b>-0.72</b>          | <b>AML193</b> | <b>AML</b>           | <b>13</b>     | <b>no data</b>        |
| <b>16</b> | <b>-0.72</b>          | <b>NB17</b>   | <b>neuroblastoma</b> | <b>1</b>      | <b>no data</b>        |
| <b>17</b> | <b>-0.65</b>          | <b>LAN2</b>   | <b>neuroblastoma</b> | <b>3</b>      | <b>no data</b>        |
| 18        | -0.64                 | TC106         | Ewing sarcoma        | 19            | EW::ERG               |
| 19        | -0.62                 | RI1           | NHL                  | 57            | no data               |
| <b>20</b> | <b>-0.62</b>          | <b>NMB</b>    | <b>neuroblastoma</b> | <b>1</b>      | <b>no data</b>        |

Non-Hodgkin Lymphoma, BCP-ALL –B-cell progenitor ALL, MPN –myeloproliferative neoplasm, ITD -internal tandem duplication

Pediatric cell lines are in **bold**.
